# Supplementary material
Source: PubMed Central journal article supplement (PMC5509159)
Supplement: NIHMS874892-supplement-2.pdf [file NIHMS874892-supplement-2.pdf]

## Supplementary tables

Table S1. Clinical responses and survival of patients with durable clinical benefit

| Patient | Clinical Response | Survival (months) | Alive |
|---------|-------------------|-------------------|-------|
| P5      | Partial response  | 55                | Yes   |
| P6      | Partial response  | 52                | Yes   |
| P12     | Complete response | 48                | Yes   |
| P13     | Partial response  | 47                | Yes   |
| P27     | Partial response  | 21                | No    |
| P26     | Stable disease    | 36                | Yes   |
| PBI-12  | Stable disease    | 31                | Yes   |

Table S2. Time between pre-treatment and post-treatment samples and the fold changes for Gal-1 antibodies

|                             | N  | Mean | S.D. | Min | Median | Max  |
|-----------------------------|----|------|------|-----|--------|------|
| Weeks between samples       | 43 | 10.2 | 3.4  | 4.7 | 9.0    | 18.0 |
| Gal-1 antibody fold changes | 43 | 1.5  | 1.0  | 0.3 | 1.1    | 4.2  |

Table S3. Distribution of patients with humoral immune responses to Gal-1

|                                   | CR  | PR   | SD   | PD   | CR/PR |
|-----------------------------------|-----|------|------|------|-------|
| Patient #                         | 1   | 7    | 22   | 13   | 8     |
| Patient # with Gal-1 Ig increase  | 1   | 4    | 8    | 3    | 5     |
| % Patients with Gal-1 Ig increase | 100 | 57.1 | 36.4 | 23.1 | 62.5  |

CR, complete response; PR, partial response; SD, stable disease; and PD, progressive disease.

Table S4. The relationship between response and Gal-1 antibody change

| Gal-1 Ig<br>fold change $\geq$ 1.5? | Complete response/partial response? |      |            |      | Fisher's Exact p-<br>value |
|-------------------------------------|-------------------------------------|------|------------|------|----------------------------|
|                                     | No<br>N=20                          |      | Yes<br>N=7 |      |                            |
|                                     | N                                   | %    | N          | %    |                            |
| No                                  | 13                                  | 86.7 | 2          | 13.3 | 0.19                       |
| Yes                                 | 7                                   | 58.3 | 5          | 41.7 |                            |

Table S5. H-scores of Gal-1 staining in pre-treatment and post-treatment tumor biopsies

| Clinical response | Patient | Tumor cells |      | Endothelial cells |      |
|-------------------|---------|-------------|------|-------------------|------|
|                   |         | Pre         | Post | Pre               | Post |
| PR                | P27     | 20          | 300  | 0                 | 270  |
|                   | P20     | 240         | 270  | 0                 | 300  |
|                   | P1      | 0           | 0    | 180               | 180  |
| SD                | P9      | 180         | 200  | 90                | 240  |
|                   | P31     | 300         | 300  | n/a               | n/a  |
|                   | PMGH1   | 180         | 0    | 80                | 0    |
| PD                | P4      | 160         | 270  | 210               | 240  |
|                   | P28     | 270         | 120  | 60                | 0    |

H-scores were calculated by multiplying the percentage of positive cells with their intensity (1, 2 or 3). PR, partial response; SD, stable disease; and PD, progressive disease.
